# Supplementary material for: A direct link between MITF, innate immunity, and hair graying
Source: PLoS Biol. 2018 May 3;16(5):e2003648. doi: 10.1371/journal.pbio.2003648 (PMC5933715; doi:10.1371/journal.pbio.2003648)
Supplement: S1 Data — (XLSX) [file pbio.2003648.s001.xlsx]

## Sheet: Figure 2E
Figure 2E
percent gated populations
	vga9/+			+/+
KIT+ CD45-	2.49	2.09	2.19	2.08	2.21	2.39
KIT+ CD45+	0.69	0.39	0.34	0.17	0.27	0.33
KIT- CD45+	2.44	1.38	1.85	1.26	1.38	1.75
T-test
	Significant?	P value	Mean1	Mean2	Difference	SE of difference	t ratio	df
KIT+ CD45-	No	0.851309	2.257	2.227	0.03	0.1501	0.1999	4
KIT+ CD45+	No	0.142343	0.4733	0.2567	0.2167	0.1188	1.823	4
KIT- CD45+	No	0.278147	1.89	1.463	0.4267	0.3403	1.254	4

## Sheet: Figure 3C
Figure 3C
relative gene expression normalized to Actb
	+/+			Mitf mi-vga9/+
Mitf	1.19944	1.08552	1.18794	0.984086	0.939714	0.960681	0.978047	0.959793	1.09028
Ifih1	0.599614	0.825452	0.760087	0.897006	1.26552	1.29329	0.697628	1.17239	1.06803
Ifit3	0.674853	0.852562	0.766282	0.886849	1.41367	1.52653	0.693448	1.41199	1.08548
Irf7	0.664724	0.596464	0.623017	0.974982	1.33233	1.4762	0.663877	1.16918	0.966589
Isg15	0.636114	0.706107	0.668358	0.974217	1.26668	1.36754	0.802273	1.08938	0.853728
Stat1	0.799717	0.87984	0.760704	1.12766	1.24141	1.40689	0.666427	0.893211	0.797759
Discovery determined using the Two-stage linear step-up procedure of Benjamini, Krieger and Yekutieli, with Q = 5%. (Graphpad Prism)
	Discovery?	P value	Mean1	Mean2	Difference	SE of difference	t ratio	df	q value
Mitf	No	0.268752	1.158	0.9854	0.1722	0.1536	1.121	42	0.141095
Ifih1	Yes	0.0337364	0.7284	1.066	-0.3373	0.1536	2.195	42	0.0265674
Ifit3	Yes	0.0116865	0.7646	1.17	-0.4051	0.1536	2.637	42	0.0159913
Irf7	Yes	0.0039174	0.6281	1.097	-0.4691	0.1536	3.053	42	0.0123398
Isg15	Yes	0.0152298	0.6702	1.059	-0.3888	0.1536	2.53	42	0.0159913
Stat1	No	0.181389	0.8134	1.022	-0.2088	0.1536	1.359	42	0.114275

## Sheet: Figure 3D
Figure 3D
relative gene expression normalized to Actb
	+/+			Mitf mi-vga9/+
Ifna4	1.2079e-05	0	8.4911e-05	2.2719e-05	8.176e-05	9.2531e-06	3.5688e-05	7.1733e-05	0.00011461
Ifnb1	3.4239e-05	0.00010045	0.00015432	3.1663e-05	0.00012298	4.491e-05	0.00019615	0.0002138	0.00023849
Ifna4	0.575233	0.390425	0.35959	1.43384	1.49809	1.81122	1.90292	1.48227	1.73777
Ifnb1	0.424457	0.297607	0.2505	1.13516	1.09354	1.21856	1.61091	1.05362	1.11233
Discovery determined using the Two-stage linear step-up procedure of Benjamini, Krieger and Yekutieli, with Q = 5%. (Graphpad Prism)
	Discovery?	P value	Mean1	Mean2	Difference	SE of difference	t ratio	df	q value
Ifna4	No	0.451009	3.233e-05	5.596e-05	-2.363e-05	2.961e-05	0.7981	7	0.242006
Ifnb1	No	0.460963	9.634e-05	0.0001413	-4.5e-05	5.769e-05	0.78	7	0.242006
Ifna4	Yes	2.92166e-05	0.4417	1.644	-1.203	0.1261	9.537	7	6.13549e-05
Ifnb1	Yes	0.00023867	0.3242	1.204	-0.8798	0.1282	6.865	7	0.000250603

## Sheet: Figure 4A
Figure 4A
relative gene expression normalized to Actb
	siMitf-scram			siMitf			siMitf-OM
Mitf	1.60373	1.76766	1.55802	0.594602	0.655692	0.63406	1.08618	1.14037	1.08729
Ifih1	0.475376	0.513991	0.417683	2.32436	2.47079	2.25307	1.36277	1.64889	1.69934
Ifit3	0.456652	0.468616	0.467304	1.70572	1.54369	1.85417	1.27832	1.35503	1.4586
Irf7	0.463906	0.420403	0.433538	2.46351	2.07093	1.73227	1.11382	1.21186	1.52245
Isg15	0.131274	0.136856	0.118616	1.35389	1.41635	1.40322	0.761106	0.756777	0.96913
Stat1	0.559056	0.619881	0.59859	1.92185	2.10523	1.65236	1.48495	1.52938	1.67736
Irf4	1.50749	1.62174	1.44177	1.13226	1.29146	1.11883	1.86733	2.17943	1.98494
Pmel	1.67734	1.9006	1.85029	0.617482	0.752556	0.653811	1.03087	1.14994	1.0625
Discovery determined using the Two-stage linear step-up procedure of Benjamini, Krieger and Yekutieli, with Q = 5%. (Graphpad Prism)
siMitf-scram vs. siMitf
	Discovery?	P value	Mean1	Mean2	Difference	SE of difference	t ratio	df	q value
Mitf	Yes	0.000104975	1.643	0.6281	1.015	0.06611	15.35	4	0.00026965
Ifih1	Yes	1.13706e-05	0.469	2.349	-1.88	0.06993	26.89	4	4.77565e-05
Ifit3	Yes	0.000160506	0.4642	1.701	-1.237	0.08974	13.78	4	0.00026965
Irf7	Yes	0.00146237	0.4393	2.089	-1.65	0.2117	7.793	4	0.00175485
Isg15	Yes	3.60082e-07	0.1289	1.391	-1.262	0.01976	63.86	4	3.02469e-06
Stat1	Yes	0.000607747	0.5925	1.893	-1.301	0.1327	9.8	4	0.000850846
Irf4	Yes	0.0109349	1.524	1.181	0.3428	0.07641	4.487	4	0.0114817
Pmel	Yes	0.000134736	1.809	0.6746	1.135	0.07874	14.41	4	0.00026965
Discovery determined using the Two-stage linear step-up procedure of Benjamini, Krieger and Yekutieli, with Q = 5%. (Graphpad Prism)
siMitf-scram vs. siMitf-OM
	Discovery?	P value	Mean1	Mean2	Difference	SE of difference	t ratio	df	q value
Mitf	Yes	0.00123566	1.643	1.105	0.5385	0.06611	8.146	4	0.00172993
Ifih1	Yes	0.000529846	0.469	1.57	-1.101	0.1085	10.15	4	0.00113704
Ifit3	Yes	6.73272e-05	0.4642	1.364	-0.8998	0.05237	17.18	4	0.00037765
Irf7	Yes	0.00242868	0.4393	1.283	-0.8434	0.1238	6.811	4	0.00291441
Isg15	Yes	0.000570519	0.1289	0.829	-0.7001	0.07028	9.961	4	0.00113704
Stat1	Yes	8.99167e-05	0.5925	1.564	-0.9714	0.06083	15.97	4	0.00037765
Irf4	Yes	0.00978714	1.524	2.011	-0.4869	0.1051	4.633	4	0.0102765
Pmel	Yes	0.000676812	1.809	1.081	0.7283	0.07642	9.53	4	0.00113704

## Sheet: Figure 4B
Figure 4B
relative gene expression normalized to Actb
	siNC1			siIrf4_a			siIrf4_b
Irf4	1.26133	1.17291	1.35753	0.650818	0.808657	0.655903	0.430448	0.440132	0.438602
Ifih1	1.20133	1.11419	1.18551	0.446172	0.500524	0.511615	1.34796	1.02212	1.15154
Ifit3	0.997634	0.978065	0.899873	0.863592	1.04571	0.953928	0.850911	0.629403	0.657281
Irf7	0.986153	1.0095	1.10105	0.552557	0.853481	0.661328	1.0085	0.7344	0.769487
Isg15	0.799122	0.883177	0.816375	0.503312	0.685529	0.579232	0.863687	0.647561	0.742238
Stat1	1.27088	1.19131	1.18657	1.17044	1.35485	1.26753	1.48954	1.45879	1.63927
Discovery determined using the Two-stage linear step-up procedure of Benjamini, Krieger and Yekutieli, with Q = 5%. (Graphpad Prism)
NC1 vs. siIRF4_a
	Discovery?	P value	Mean1	Mean2	Difference	SE of difference	t ratio	df	q value
Irf4	Yes	0.00167513	1.264	0.7051	0.5588	0.07432	7.519	4	0.00175889
Ifih1	Yes	3.48938e-05	1.167	0.4861	0.6809	0.03357	20.28	4	7.32771e-05
Ifit3	No	0.949035	0.9585	0.9544	0.004113	0.06046	0.06802	4	0.332162
Irf7	Yes	0.0222972	1.032	0.6891	0.3431	0.0947	3.623	4	0.011706
Isg15	Yes	0.014301	0.8329	0.5894	0.2435	0.05873	4.146	4	0.0100107
Stat1	No	0.467425	1.216	1.264	-0.04802	0.05987	0.8021	4	0.196319
Discovery determined using the Two-stage linear step-up procedure of Benjamini, Krieger and Yekutieli, with Q = 5%. (Graphpad Prism)
NC1 vs. siIRF4_b
	Discovery?	P value	Mean1	Mean2	Difference	SE of difference	t ratio	df	q value
Irf4	Yes	0.00010117	1.264	0.4364	0.8275	0.05339	15.5	4	0.000424914
Ifih1	No	0.94776	1.167	1.174	-0.006864	0.09844	0.06972	4	0.663432
Ifit3	Yes	0.0315012	0.9585	0.7125	0.246	0.07579	3.246	4	0.0441016
Irf7	No	0.104269	1.032	0.8375	0.1948	0.09298	2.095	4	0.109482
Isg15	No	0.293215	0.8329	0.7512	0.08173	0.0676	1.209	4	0.246301
Stat1	Yes	0.00728163	1.216	1.529	-0.313	0.06209	5.04	4	0.0152914

## Sheet: Figure 4D
Figure 3D
relative gene expression normalized to Actb
ChIP pulldown enrichment
	IgG		MITF ChIP
Dct	0.04		1.69	2.07
Ifih1	0.05		0.77	0.87
Ifit3	0.04		1.04	1.22
Stat1	0.03		0.92	1.18
neg con	0.02		0.04	0.05

## Sheet: Figure 5A
Figure 5A
relative gene expression normalized to Actb
	+/+									Tg/0				Mitf mi-vga9/+					Tg/0;Mitf mi-vga9/+
Ifih1	0.568271	0.539383	0.560807	0.298467	0.392641	0.277275	0.606823	0.762468	0.767301	0.554052	0.714647	0.723354	0.784655	0.884083	0.588625	0.577961	0.455428	1.56852	0.900964	0.506405	0.492438	0.541856	1.40323	1.29868	1.68468
Ifit3	0.388102	0.876335	0.72018	1.16801	0.86353	0.478668	0.327769	0.556659	0.398516	0.961717	0.538678	0.427811	0.392976	0.788286	1.11736	0.582873	0.781692	1.10538	0.613885	1.06712	1.12256	0.606838	1.25992	0.915036	1.30396
Irf7	0.257796	0.183696	0.14619	0.107324	0.137957	0.109402	0.0830769	0.129169	0.145479	0.365001	0.229837	0.0865892	0.114841	0.639922	0.585785	0.480974	0.298343	0.858346	0.802735	0.229686	0.22344	0.473096	1.12831	0.951211	0.913256
Isg15	0.524309	0.502523	0.436352	0.727946	0.439094	0.413081	0.287976	0.364171	0.34626	0.677703	0.384493	0.344786	0.301266	0.982604	0.836149	0.649528	0.717848	0.844769	0.644493	0.774163	0.691429	0.56039	1.01356	0.752829	0.987291
Stat1	0.872139	0.597583	0.665906	0.448871	0.452553	0.402535	0.57263	0.695195	0.616367	0.786975	0.670293	0.577639	0.667913	1.32587	0.782795	0.747255	0.617911	1.1606	0.99361	0.648194	0.523437	0.628355	1.25148	1.09361	1.58938
Mitf	1.11905	1.66833	2.54975	2.14146	2.19162	1.77004	2.63072	2.72895	2.76114	1.33663	2.52768	3.23561	2.22868	0.76812	1.3021	1.14672	1.48814	1.68679	1.2925	1.09437	1.29456	1.11238	1.2344	0.806904	0.941885
Discovery determined using the Two-stage linear step-up procedure of Benjamini, Krieger and Yekutieli, with Q = 5%. (Graphpad Prism)
+/+ vs Mitfvga9
	Discovery?	P value	Mean1	Mean2	Difference	SE of difference	t ratio	df	q value
Ifih1	Yes	0.112427	0.5304	0.8149	-0.2845	0.1661	1.713	12	0.0472194
Ifit3	No	0.143685	0.642	0.8751	-0.2331	0.149	1.564	12	0.0502898
Irf7	Yes	5.45794e-05	0.1445	0.5727	-0.4282	0.07037	6.085	12	0.000114617
Isg15	Yes	0.000313835	0.4491	0.8062	-0.3571	0.07154	4.991	12	0.000329527
Stat1	Yes	0.0145986	0.5915	0.9269	-0.3354	0.1176	2.851	12	0.00766425
Mitf	Yes	0.00768475	2.173	1.278	0.8951	0.28	3.196	12	0.00537932
+/+ vs Tg/0
	Discovery?	P value	Mean1	Mean2	Difference	SE of difference	t ratio	df	q value
Ifih1	No	0.11801	0.5304	0.6942	-0.1638	0.09659	1.696	11	0.658478
Ifit3	No	0.718773	0.642	0.5803	0.06168	0.1669	0.3695	11	0.839823
Irf7	No	0.276404	0.1445	0.1991	-0.05461	0.04769	1.145	11	0.658478
Isg15	No	0.799831	0.4491	0.4271	0.02202	0.08475	0.2598	11	0.839823
Stat1	No	0.313561	0.5915	0.6757	-0.08417	0.0797	1.056	11	0.658478
Mitf	No	0.684028	2.173	2.332	-0.1587	0.3797	0.4179	11	0.839823
+/+ vs Tg/0;Mitfvga9/+
	Discovery?	P value	Mean1	Mean2	Difference	SE of difference	t ratio	df	q value
Ifih1	Yes	0.0235633	0.5304	0.9755	-0.4451	0.1752	2.54	14	0.0296897
Ifit3	Yes	0.031571	0.642	0.9842	-0.3422	0.1433	2.388	14	0.0331495
Irf7	Yes	0.000667089	0.1445	0.6745	-0.5301	0.1219	4.349	14	0.00140089
Isg15	Yes	0.00062092	0.4491	0.7749	-0.3258	0.07428	4.386	14	0.00140089
Stat1	Yes	0.0188837	0.5915	0.9612	-0.3696	0.1393	2.654	14	0.0296897
Mitf	Yes	0.000300963	2.173	1.111	1.062	0.2229	4.766	14	0.00140089

## Sheet: Figure 5B
Figure 5B
cell counts
	+/+					Mitfmi-vga9/+					Tg/0;Mitf mi-vga9/+
mast cells	34	27	67	56		37	39	39	29		44	34	42	47
CD4+ cells	86	156	159	131		147	155	90			159	94	126
CD8+ cells	42	44	89	68		61	58	38			62	110	44
CD3e+ cells	122	133	213	193	134	112	120	227	125		157	92	99	99
CD11b+ cells	43	54	79	39		72	41	37			29	37	49
T Test
	Significant?	P value	Mean1	Mean2	Difference	SE of difference	t ratio	df
mast cells	No	0.677894	46	41.75	4.25	9.741	0.4363	6
CD4+ cells	No	0.803445	133	126.3	6.667	25.4	0.2625	5
CD8+ cells	No	0.61651	60.75	72	-11.25	21.09	0.5335	5
CD3e+ cells	No	0.0975421	159	111.8	47.25	24.72	1.911	7
CD11b+ cells	No	0.244772	53.75	38.33	15.42	11.7	1.318	5

## Sheet: Figure 7BCDE
Figure 7B, C, D, E
histograms of percent of hairs with varying number of McSCs or melanocytes
		McSC				melanoyte					Kolmogorov-Smirnov tests
		wt_vehicle	wt_PIC	Tg/+_vehicle	Tg/+_PIC	wt_vehicle	wt_PIC	Tg/+_vehicle	Tg/+_PIC
		3	4	3	2	4	3	9	4		McSC
		5	2	0	2	5	12	1	6		Table Analyzed	McSC-wt		Table Analyzed	McSC-dctsox10
		4	1	0	2	1	3	9	3
		3	3	4	0	0	9	0	3		Column A	wt_vehicle		Column A	Tg/+_vehicle
		4	5	2	0	7	6	8	2		vs.	vs.		vs.	vs.
		6	2	0	0	2	6	6	7		Column B	wt_PIC		Column B	Tg/+_PIC
		1	3	1	1	5	3	10	7
		3	4	2	4	3	1	8	3		Kolmogorov-Smirnov test			Kolmogorov-Smirnov test
		3	3	2	1	7	5	4	9		P value	>0.9999		P value	<0.0001
		2	9	5	1	3	2	0	0		Exact or approximate P value?	Approximate		Exact or approximate P value?	Approximate
		6	2	0	0	7	6	5	9		P value summary	ns		P value summary	****
		2	2	3	0	6	4	10	2		Significantly different (P < 0.05)?	No		Significantly different (P < 0.05)?	Yes
		2	6	1	4	9	6	0	0		Kolmogorov-Smirnov D	0.05333		Kolmogorov-Smirnov D	0.2549
		3	5	4	1	6	6	1	4
		3	4	4	2	5	6	7	1		melanocyte
		4	6	4	3	10	6	10	3		Table Analyzed	melanocyte-wt		Table Analyzed	melanocyte-dctsox10
		4	4	6	2	8	5	1	4
		6	3	5	0	5	3	8	2		Column A	wt_vehicle		Column A	Tg/+_vehicle
		5	5	1	0	6	6	5	0		vs.	vs.		vs.	vs.
		3	5	7	3	8	5	11	4		Column B	wt_PIC		Column B	Tg/+_PIC
		4	3	4	1	10	10	6	2
		4	5	4	1	9	7	6	3		Kolmogorov-Smirnov test			Kolmogorov-Smirnov test
		3	5	4	1	4	6	8	0		P value	0.2923		P value	<0.0001
		7	3	0	0	6	4	14	0		Exact or approximate P value?	Approximate		Exact or approximate P value?	Approximate
		5	4	5	1	2	3	2	6		P value summary	ns		P value summary	****
		2	3	0	1	6	5	8	4		Significantly different (P < 0.05)?	No		Significantly different (P < 0.05)?	Yes
		5	4	4	4	2	4	6	6		Kolmogorov-Smirnov D	0.16		Kolmogorov-Smirnov D	0.3218
		2	6	0	2	11	6	1	1
		1	5	2	0	12	7	1	1
		4	1	4	1	10	7	9	3
		6	3	2	2	11	3	7	0
		6	3	3	3	3	7	10	1
		3	1	4	3	3	4	6	6
		4	0	2	1	3	13	4	3
		3	4	2	0	7	8	7	5
		5	1	3	2	14	7	2	0
		5	2	2	1	7	8	0	5
		2	3	2	3	12	4	2	1
		5	6	0	3	7	3	4	3
		5	4	1	0	5	12	4	7
		2	1	0	1	7	9	8	5
		2	4	3	2	1	6	0	0
		3	3	2	1	4	6	7	1
		5	5	3	1	9	5	2	0
		4	5	1	4	13	4	5	8
		4	5	2	3	3	5	3	5
		3	2	2	2	1	0	10	2
		1	3	3	2	7	3	11	2
		3	3	2	0	8	7	6	3
		2	5	2	0	14	16	6	1
		4	4	2	5	5	5	8	0
		1	4	2	2	4	5	10	5
		2	4	1	1	5	2	13	0
		4	1	1	1	2	5	3	2
		2	5	2	1	4	6	13	5
		5	3	2	2	4	4	5	11
		3	6	5	2	11	3	5	3
		3	2	4	3	6	4	6	0
		6	1	1	4	4	5	4	3
		2	3	3	3	3	3	13	1
		5	3	3	3	4	6	4	7
		7	4	5	1	2	3	11	4
		3	2	3	3	6	4	9	11
		2	4	2	0	5	5	13	3
		3	2	0	4	6	6	0	0
		1	3	4	0	2	1	1	6
		5	6	1	2	6	1	8	3
		3	4	3	3	3	8	7	5
		2	5	3	0	7	1	7	5
		5	3	4	2	4	3	14	0
		3	2	4	2	5	2	8	4
		2	4	0	3	9	6	5	4
		3	1	4	6	3	5	7	1
		6	5	4	3	3	6	2	5
		6	3	4	0	7	4	4	0
				1	2			5	1
				4	3			5	0
				2	1			6	6
				1	1			6	5
				6	2			3	4
				1	2			13	0
				0	4			0	0
				6	1			8	3
				3	1			0	4
				4	0			5	1
				4	4			6	0
				1	0			7	11
				1	1			10	6
				1	6			11	4
				2	2			8	0
				3	2			11	5
				4	7			2	4
				4	1			6	0
				2	0			7	2
				3	4			1	8
				1	2			4	8
				2	0			3	9
				3	2			9	1
				5	2			3	0
				2	3			1	5
				1	2			5	2
				1	1			8	1
				2	2			2	5
				1	2			2	1
				1	3			6	2
				4	2			3	0
				2	2			5	2
				3	0			5	3
				2	2			4	4
				3	2			7	4
				4	0			2	0
				4	2			5	2
				1	2			7	1
				4	0			8	3
				3	0			6	2
				4	1			4	2
				2	4			4	0
				2	0			8	2
				0	0			5	2
				4	0			8	4
				2	2			1	0
				3	1			8	1
				3	2			2	0
				1	1			0	3
				0	0			8	2
				4	0			9	1
				5	2			0	4
				2	1			3	0
				3	2			1	1
				2	1			4	1
				0	1			6	0
				1	2			2	0
				2	0			5	5
				3	3			5	0
				4	1			0	3
				1	0			0	0
				2	3			2	0
				3	2			0	3
				2	0			8	3
				2	1			7	0
				3	0			0	0
				5	1			2	1
				3	0			0	0
				4	2			5	5
				3	1			4	5
				1	0			9	4
				6	0			0	4
				4	2			12	3
				7	2			4	2
				4	2			0	4
				3	0			6	2
				3	0			5	0
				1	0			0	2
				0	3			0	0
				3	2			0	1
				1	4			5	4
				5	1			1	1
				3	0			3	3
				1	3			0	0
				3	2			7	0
				3	0			8	0
				1	0			10	1
				3	4			3	6
				1	3			2	2
				3	3			7	3
				2	1			5	4
				3	0			7	2
				5	2			2	4
				3	3			1	4
				2	2			3	2
				3	2			2	6
				2	1			0	6
				2	3			7	3
				4	2			0	3
				4	2			2	2
				2	3			0	4
				1	1			0	0
				2	1			0	3
				3	2			5	5
				4	3			3	1
				2	2			0	5
				0	1			3	3
				2	3			0	2
				1	2			0	0
				4	4			5	0
				5	1			2	5
				5	0			9	4
				4	1			4	2
				4	0			1	2
				3	1			1	0
				4	3			4	2
				0	4			0	4
				6	4			0	6
				4	0			3	4
				3	4			4	2
				0	1			2	3
					2			3	1
					2			5	1
					1			0	0
					4			1	3
					3			2	0
					1				2
					1				1
					1				3
					0				1
					2				3
					0				1
					2				0
					2				1
					4				5
					2				1
					1				2
					4				4
					1				1
					3				2
					0				5
					0				4
					3				1
					1				0
					1				3
					3				4
					0				3
					1				6
					1				0
					1				2
					1				0
					0				2
					0				3
					1				1
					3				4
					1				2
					2				6
					1				1
					3				5
					2				0
					0				0
					3				3
					3				3
					3				0
					2				4
					1				4
					3				3
					2				1
					3				5
					1				3
					1				1
					1				0
					0				4
					4				0
					1				4
					3				1
					0				0
					1				3
					1				3
					2				0
					0				4
					2				1
					3
					1
					3
					3
					1
					3
					1
					1

## Sheet: Figure 7F
Figure 7F
Proportion of pigmented and non-pigmented McSCs
	DCT+/PIG-	DCT+/PIG+
Tg/0_vehicle	144	112
Tg/0_PIC	183	77
Contigency Table
Table Analyzed	PIC experiment_DctSox10 EPMS
P value and statistical significance
Test	Fisher's exact test
P value	0.001
P value summary	***
One- or two-sided	Two-sided
Statistically significant (P < 0.05)?	Yes
Data analyzed	DCT+/PIG-	DCT+/PIG+	Total
Tg/0_vehicle	144	112	256
Tg/0_PIC	183	77	260
Total	327	189	516
Percentage of row total	DCT+/PIG-	DCT+/PIG+
Tg/0_vehicle	56.25%	43.75%
Tg/0_PIC	70.38%	29.62%
Percentage of column total	DCT+/PIG-	DCT+/PIG+
Tg/0_vehicle	44.04%	59.26%
Tg/0_PIC	55.96%	40.74%
Percentage of grand total	DCT+/PIG-	DCT+/PIG+
Tg/0_vehicle	27.91%	21.71%
Tg/0_PIC	35.47%	14.92%
